# Supplementary material
Source: publisher figshare collection journal article supplement (https://frontiersin.figshare.com/ndownloader/files/22089804)
Supplement: Supplementary file 1 [file 22089804]

**Supplementary Table 5.** Species trait-based originalities as a function of their traits. The table provides results of generalized least squares models with a correlation structure in the residuals assuming a Brownian motion model along the branches of the phylogeny (functions corBrownian and gls from packages ape and nlme of R, respectively). Models were done at the regional level and per land-cover type as specified in the column labels. Traits were centered and scaled so that the coefficients of the model are comparable. Species with missing trait values were removed from each model. The symbol  $\emptyset$  in a cell of the table means that none of the species with this trait value were observed in the type of land cover. In bold are significative results (type I error rate  $\alpha = 5\%$ ).

|                                           | Region                          | Forest                          | Semi-natural area               | Agriculture                     | Urban green area                | Built-up area                   |
|-------------------------------------------|---------------------------------|---------------------------------|---------------------------------|---------------------------------|---------------------------------|---------------------------------|
| <i>Quantitative and ordinal variables</i> |                                 |                                 |                                 |                                 |                                 |                                 |
| Flowering start                           | <b>-9.9 10<sup>-3</sup> ***</b> | <b>-9.2 10<sup>-3</sup> *</b>   | <b>-8.7 10<sup>-3</sup> *</b>   | <b>-1.2 10<sup>-2</sup> ***</b> | -4.8 10 <sup>-3</sup> NS        | <b>-9.6 10<sup>-4</sup> **</b>  |
| Flowering duration                        | <b>5.3 10<sup>-3</sup> ***</b>  | 4.4 10 <sup>-3</sup> NS         | <b>6.4 10<sup>-3</sup> *</b>    | 2.6 10 <sup>-3</sup> NS         | 3.9 10 <sup>-3</sup> NS         | 3.3 10 <sup>-3</sup> NS         |
| Reproduction type                         | 4.9 10 <sup>-4</sup> NS         | 1.6 10 <sup>-3</sup> NS         | 2.3 10 <sup>-3</sup> NS         | -2.4 10 <sup>-3</sup> NS        | 3.3 10 <sup>-3</sup> NS         | 4.1 10 <sup>-3</sup> NS         |
| Seed weight (log)                         | -2.9 10 <sup>-5</sup> NS        | -6.6 10 <sup>-4</sup> NS        | -7.7 10 <sup>-6</sup> NS        | -6.7 10 <sup>-5</sup> NS        | -2.2 10 <sup>-3</sup> NS        | 5.1 10 <sup>-4</sup> NS         |
| LDMC                                      | <b>4.0 10<sup>-3</sup> **</b>   | <b>8.4 10<sup>-3</sup> *</b>    | -4.4 10 <sup>-4</sup> NS        | 5.0 10 <sup>-3</sup> NS         | 3.3 10 <sup>-3</sup> NS         | <b>8.0 10<sup>-3</sup> *</b>    |
| Leaf size (log)                           | -1.8 10 <sup>-3</sup> NS        | 3.3 10 <sup>-3</sup> NS         | 1.2 10 <sup>-3</sup> NS         | 4.8 10 <sup>-3</sup> NS         | -2.8 10 <sup>-3</sup> NS        | 1.2 10 <sup>-3</sup> NS         |
| SLA                                       | <b>5.1 10<sup>-3</sup> ***</b>  | <b>5.8 10<sup>-3</sup> *</b>    | <b>8.7 10<sup>-3</sup> *</b>    | 1.9 10 <sup>-3</sup> NS         | <b>6.0 10<sup>-3</sup> ***</b>  | 4.6 10 <sup>-3</sup> NS         |
| Plant height (log)                        | -2.5 10 <sup>-4</sup> NS        | -7.9 10 <sup>-4</sup> NS        | -1.1 10 <sup>-3</sup> NS        | <b>-7.1 10<sup>-3</sup> *</b>   | -7.1 10 <sup>-4</sup> NS        | -4.0 10 <sup>-3</sup> NS        |
| <i>Life span (Binary)</i>                 |                                 |                                 |                                 |                                 |                                 |                                 |
| Annual                                    | -2.3 10 <sup>-3</sup> NS        | <b>1.3 10<sup>-2</sup> *</b>    | 4.3 10 <sup>-3</sup> NS         | -3.5 10 <sup>-3</sup> NS        | <b>1.1 10<sup>-2</sup> **</b>   | -2.1 10 <sup>-4</sup> NS        |
| Biannual                                  | <b>3.4 10<sup>-3</sup> **</b>   | 4.9 10 <sup>-3</sup> NS         | 1.2 10 <sup>-3</sup> NS         | 3.7 10 <sup>-3</sup> NS         | <b>5.8 10<sup>-3</sup> **</b>   | 4.5 10 <sup>-3</sup> NS         |
| Pluriannual                               | <b>3.1 10<sup>-3</sup> ***</b>  | 4.5 10 <sup>-3</sup> NS         | -7.2 10 <sup>-5</sup> NS        | 3.0 10 <sup>-3</sup> NS         | <b>3.7 10<sup>-3</sup> *</b>    | 5.6 10 <sup>-4</sup> NS         |
| Perennial                                 | <b>-1.4 10<sup>-2</sup> ***</b> | -4.9 10 <sup>-3</sup> NS        | <b>-2.2 10<sup>-2</sup> ***</b> | 1.2 10 <sup>-4</sup> NS         | <b>-8.5 10<sup>-3</sup> *</b>   | <b>-1.2 10<sup>-2</sup> **</b>  |
| <i>Pollination vector (Binary)</i>        |                                 |                                 |                                 |                                 |                                 |                                 |
| Apomixis                                  | 1.4 10 <sup>-3</sup> NS         | $\emptyset$                     | $\emptyset$                     | 8.3 10 <sup>-4</sup> NS         | $\emptyset$                     | $\emptyset$                     |
| Geitonogamy                               | <b>4.0 10<sup>-3</sup> ***</b>  | -1.5 10 <sup>-3</sup> NS        | -9.1 10 <sup>-4</sup> NS        | <b>4.4 10<sup>-3</sup> **</b>   | <b>5.2 10<sup>-3</sup> ***</b>  | 2.8 10 <sup>-3</sup> NS         |
| Insects                                   | <b>-1.1 10<sup>-2</sup> ***</b> | -1.0 10 <sup>-2</sup> NS        | -4.5 10 <sup>-3</sup> NS        | <b>-1.1 10<sup>-2</sup> *</b>   | -5.3 10 <sup>-3</sup> NS        | -8.5 10 <sup>-3</sup> NS        |
| Self spontaneous                          | <b>-8.9 10<sup>-3</sup> ***</b> | -4.7 10 <sup>-3</sup> NS        | <b>-9.8 10<sup>-3</sup> **</b>  | <b>-8.0 10<sup>-3</sup> ***</b> | <b>-9.1 10<sup>-3</sup> ***</b> | <b>-1.0 10<sup>-2</sup> ***</b> |
| Water                                     | 2.1 10 <sup>-3</sup> NS         | 1.3 10 <sup>-3</sup> NS         | $\emptyset$                     | $\emptyset$                     | $\emptyset$                     | $\emptyset$                     |
| Wind                                      | 2.2 10 <sup>-3</sup> NS         | 5.9 10 <sup>-3</sup> NS         | 6.3 10 <sup>-3</sup> NS         | -6.3 10 <sup>-4</sup> NS        | <b>1.1 10<sup>-2</sup> *</b>    | 8.1 10 <sup>-3</sup> NS         |
| <i>Seed dispersal mode (Binary)</i>       |                                 |                                 |                                 |                                 |                                 |                                 |
| Self                                      | 1.2 10 <sup>-3</sup> NS         | -1.6 10 <sup>-3</sup> NS        | 1.0 10 <sup>-3</sup> NS         | -2.8 10 <sup>-3</sup> NS        | 1.5 10 <sup>-4</sup> NS         | 1.6 10 <sup>-4</sup> NS         |
| Wind                                      | <b>-6.0 10<sup>-3</sup> ***</b> | -5.3 10 <sup>-3</sup> NS        | -6.0 10 <sup>-3</sup> NS        | <b>-9.4 10<sup>-3</sup> ***</b> | <b>-5.8 10<sup>-3</sup> *</b>   | <b>-1.2 10<sup>-2</sup> ***</b> |
| Animals                                   | <b>-3.2 10<sup>-3</sup> **</b>  | 1.0 10 <sup>-3</sup> NS         | <b>-1.3 10<sup>-2</sup> ***</b> | <b>-1.2 10<sup>-2</sup> ***</b> | <b>-1.5 10<sup>-2</sup> ***</b> | <b>-1.4 10<sup>-2</sup> **</b>  |
| Human activity                            | <b>-6.2 10<sup>-3</sup> ***</b> | <b>-1.2 10<sup>-2</sup> ***</b> | <b>-1.5 10<sup>-2</sup> ***</b> | <b>-7.8 10<sup>-3</sup> ***</b> | <b>-7.9 10<sup>-3</sup> ***</b> | <b>-8.7 10<sup>-3</sup> ***</b> |
| Water flows                               | <b>-4.2 10<sup>-3</sup> ***</b> | <b>-8.0 10<sup>-3</sup> **</b>  | <b>-8.1 10<sup>-3</sup> *</b>   | <b>-6.3 10<sup>-3</sup> **</b>  | <b>-6.6 10<sup>-3</sup> **</b>  | -3.1 10 <sup>-3</sup> NS        |

P-values: NS = non-significant ( $P > 0.050$ ); \* =  $0.010 < P \leq 0.050$ ; \*\* =  $0.001 < P \leq 0.010$ ; \*\*\* =  $P \leq 0.001$ .
